# Supplementary material
Source: PubMed Central journal article supplement (PMC7081948)
Supplement: NIHMS1067275-supplement-Supp_Files.pdf [file NIHMS1067275-supplement-Supp_Files.pdf]

# Supporting Information

## Active instrument engagement combined with a real-time database search for improved performance of sample multiplexing workflows

Brian K. Erickson<sup>1</sup>, Julian Mintseris<sup>1</sup>, Devin K. Schweppe<sup>1</sup>, José Navarrete-Perea<sup>1</sup>, Alison R. Erickson<sup>1</sup>, David P. Nusinow<sup>1</sup>, Joao A. Paulo<sup>1</sup>, Steven P. Gygi<sup>\*1</sup>

<sup>1</sup>Department of Cell Biology, Harvard Medical School, Boston, Massachusetts, 02115, USA

\*Correspondence: S.P.G ([Steven\\_Gygi@hms.harvard.edu](mailto:Steven_Gygi@hms.harvard.edu))

## Table of contents

**Supporting Table S1: Comprehensive proteome characterization retains only a portion of the acquired data after filtering.**

**Supporting Figure 1: Graphical user interface of the RTS client application**

**Supporting Figure 2: Distribution of time (seconds) between acquisition of RTS triggered MS<sup>3</sup> and preceding parent MS<sup>2</sup>.**

**Supporting Figure 3: Selection of identified fragment ions improves MS<sup>3</sup> accuracy and precision.**

**Supporting Figure 4: RTS-MS<sup>3</sup> improves the quantitative performance of lower abundance peptides.**

**Supporting Table S2: Two-proteome model of interference quantitative protein data\***

**Supporting Table S3: Quantitative protein data for kinase characterization\***

**Supporting Table S4: Quantitative protein data for deep-proteome comparison\***

\* provided in a separate Excel file

|                    | <b>12 fractions x 3 hours per fraction (10-plex)</b> |                 |                           |
|--------------------|------------------------------------------------------|-----------------|---------------------------|
|                    | <b>Total</b>                                         | <b>Filtered</b> | <b>% spectra retained</b> |
| <b>MS2 spectra</b> | 391,927                                              | 120,413         | 31%                       |
| <b>MS3 spectra</b> | 391,916                                              | 101,041         | 26%                       |

**Supporting Table S1 - Comprehensive proteome characterization retains only a portion of the acquired data after filtering.** A 10-plex sample of human cancer cell lines was analyzed for 36 hours (12 fractions, 3 hours per fraction). Filtering to a false-discovery rate of 1% at the peptide and protein level resulted in the retention of 31% of the acquired MS<sup>2</sup> spectral data. Additional filtering for quantitative robustness resulted in the omission of nearly 75% of the acquired MS<sup>3</sup> spectra.

RTS-MS3 - v0.1.7

1) Start Online Access

2) Load Parameters

After acq. - Dispose

Spectra

☒ Monitor MS2

Number of MS2 Scans Arrived

Number of MS3s triggered

[Send feedback](#)

RTS-MS3

Status

Organism
 

☒ Human
 ☐ Mouse
 ☐ Yeast
 ☐ Human-Yeast(trigger yeast)
 ☐ Human-Mouse(trigger human)
 ☐ Custom peptide DB:

RTS parameters
 

Binom. cutoff 
 Min. # AA residues

Gene Close-out
 

☐ Close-out (y/n)

Search tolerance (NYI)
 

☒ ITMS2 (Th) 
☐ FTMS2 (PPM)

MS3 Parameters
 

MS2 Iso. width 
 MS3 AGC 
 MS3 Max Inject. (ms) 
 MS3 HCD CE 
 MS3 OT Res. 
 SPS ion cutoff (% of BP)

Trigger list (1 protein ID per line) 

Browse

☐ Specify protein inclusion (only peptides from specified proteins will trigger MS3s):

**Supporting Figure 1: Graphical user interface of the RTS client application.** The interface allows for the selection of parameters related to the real-time search and for controlling the scan specific parameters of the triggered MS<sup>3</sup>.

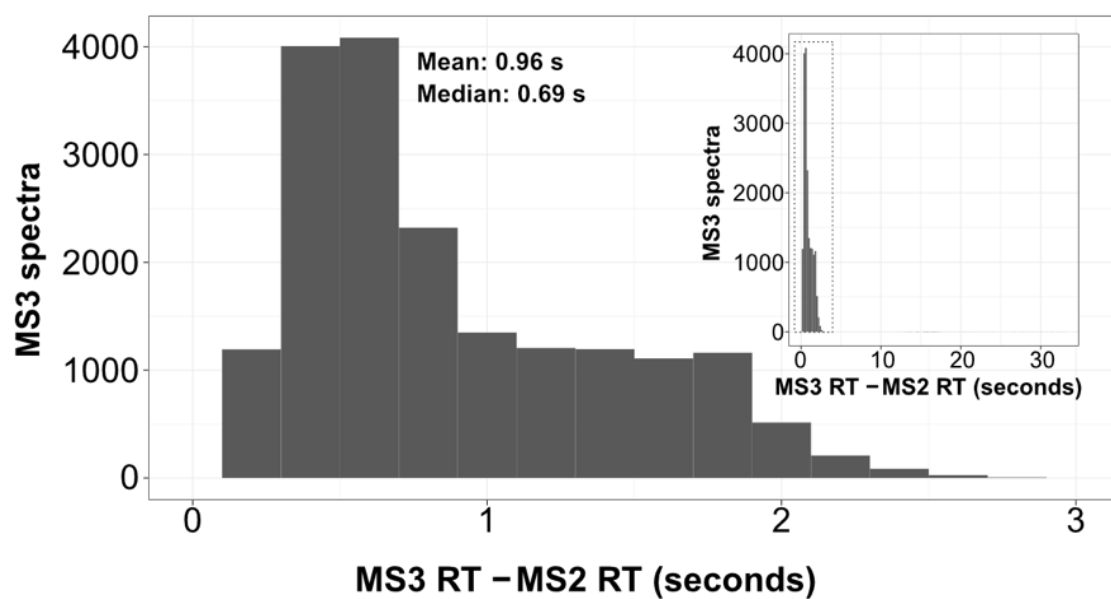

**Supporting Figure 2: Distribution of time (seconds) between acquisition of RTS triggered MS<sup>3</sup> and preceding parent MS<sup>2</sup>.** On average, the time between the receipt of an MS<sup>2</sup> from the instrument and the acquisition of a quantitative MS<sup>3</sup> is less than one second (mean = 0.96 s, median = 0.69 s).

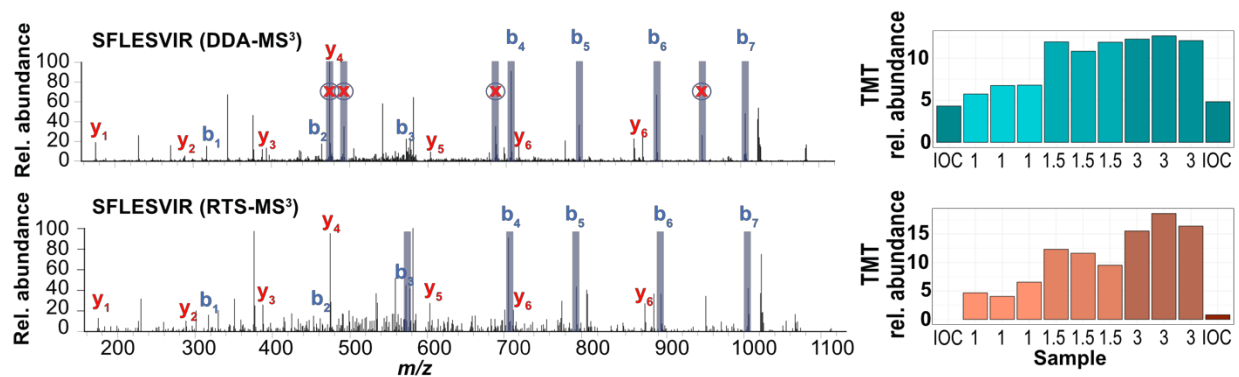

**Supporting Figure 3: Selection of identified fragment ions improves MS<sup>3</sup> accuracy and precision.**

Synchronous precursor selection (SPS) of fragment ions for the MS<sup>3</sup> scan can be chosen from known b- and y-type fragment ions with RTS-MS<sup>3</sup>. A DDA-MS<sup>3</sup> approach utilizes the top n (where n = 1 – 20) most abundant fragment ions. In many cases, fragment ions from co-isolated peptides can be included, resulting in a reduction of quantitative accuracy and precision. Alternatively, following confident peptide identification by the RTS-MS<sup>3</sup> algorithm, an MS<sup>3</sup> spectra with SPS ions chosen only from identified fragments ions is acquired on the instrument. For the peptide 'SFLESVIR', quantified both by DDA-MS<sup>3</sup> and RTS-MS<sup>3</sup> analyses, the resulting quantification differs substantially. The DDA-MS<sup>3</sup> acquired MS<sup>3</sup> exhibits measurable interference in the interference-only channel (IOC) and ratio compression due to the inclusion of unassigned ions. However, the RTS-MS<sup>3</sup> acquired data, using only precursor specific fragment ions, resulted in an MS<sup>3</sup> with nearly zero interference and accurate ratios.

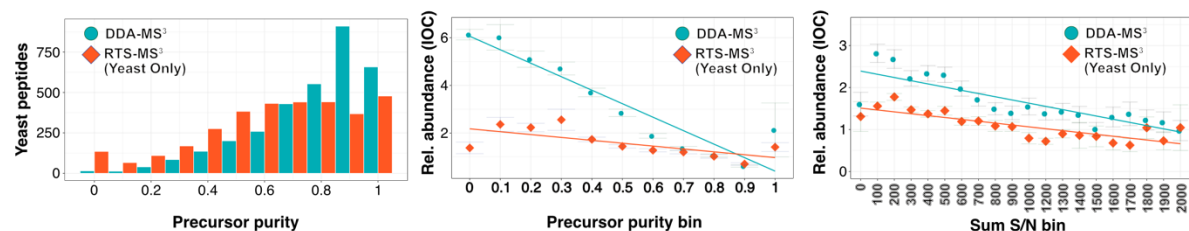

**Supporting Figure 4: RTS-MS<sup>3</sup> improves the quantitative performance of lower abundance peptides.**

Analysis of the two-proteome model of interference indicates that lower purity precursors are more routinely interrogated during RTS-MS<sup>3</sup> acquisition. For DDA-MS<sup>3</sup> analysis, as the purity of the precursors decrease, the amount of interference measured in the interference-only channels (IOC) increases. However, during RTS-MS<sup>3</sup> acquisition, the amount of interference remains nearly constant. Furthermore, for all summed signal-to-noise bins, the amount of observed interference was determined to be lower for RTS-MS<sup>3</sup> analysis.
